# Supplementary material for: Ti3+ self-doped TiOx@anatase core–shell structure with enhanced visible light photocatalytic activity
Source: Royal Society of Chemistry journal article supplement (doi:10.1039/c3ta10413c), 2013-01-01
Supplement: c3ta10413c.pdf [file c3ta10413c.pdf]

## Electronic supporting informations

### **Ti<sup>3+</sup> self-doped TiO<sub>x</sub>@anatase core/shell structure with enhanced visible light photocatalytic activity**

Hongye Zhang, Yanfei Zhao, Sha Chen, Bo Yu, Jilei Xu, Huanjun Xu, Leiduan Hao and  
Zhimin Liu\*

Beijing National Laboratory for Molecular Sciences, Key Laboratory of Colloid, Interface and  
Chemical Thermodynamics, Institute of Chemistry, Chinese Academy of Sciences, Beijing 100190,  
China. Fax: (+)8610-62562821; E-mail: [liuzm@iccas.ac.cn](mailto:liuzm@iccas.ac.cn).

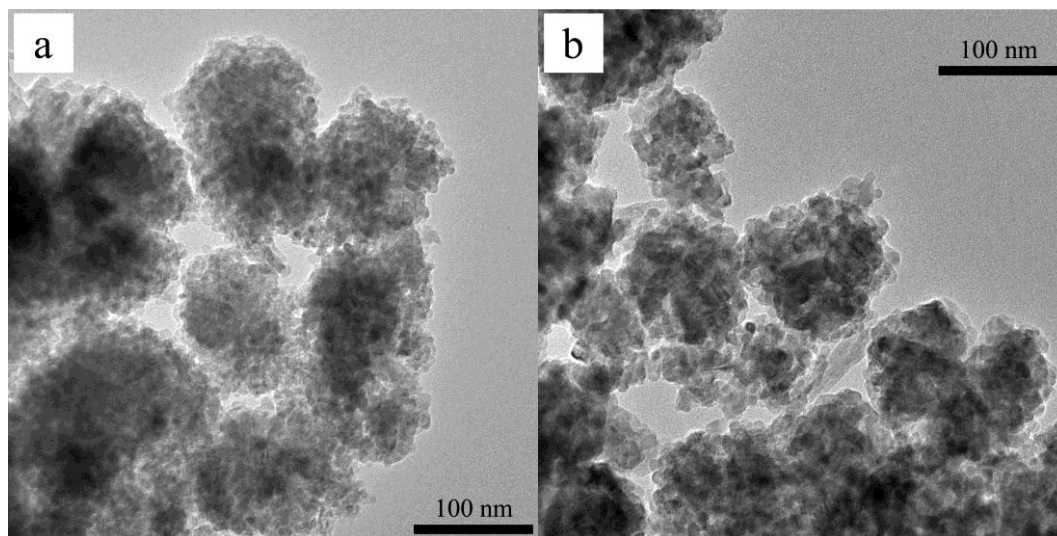

Fig. S1 The (HR)TEM images of T-723 and T-823.

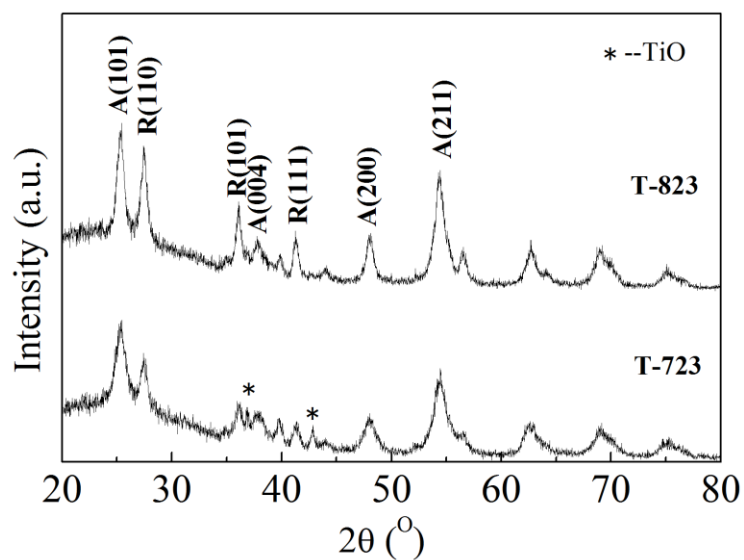

Fig. S2 XRD patterns of T-723 and T-823.

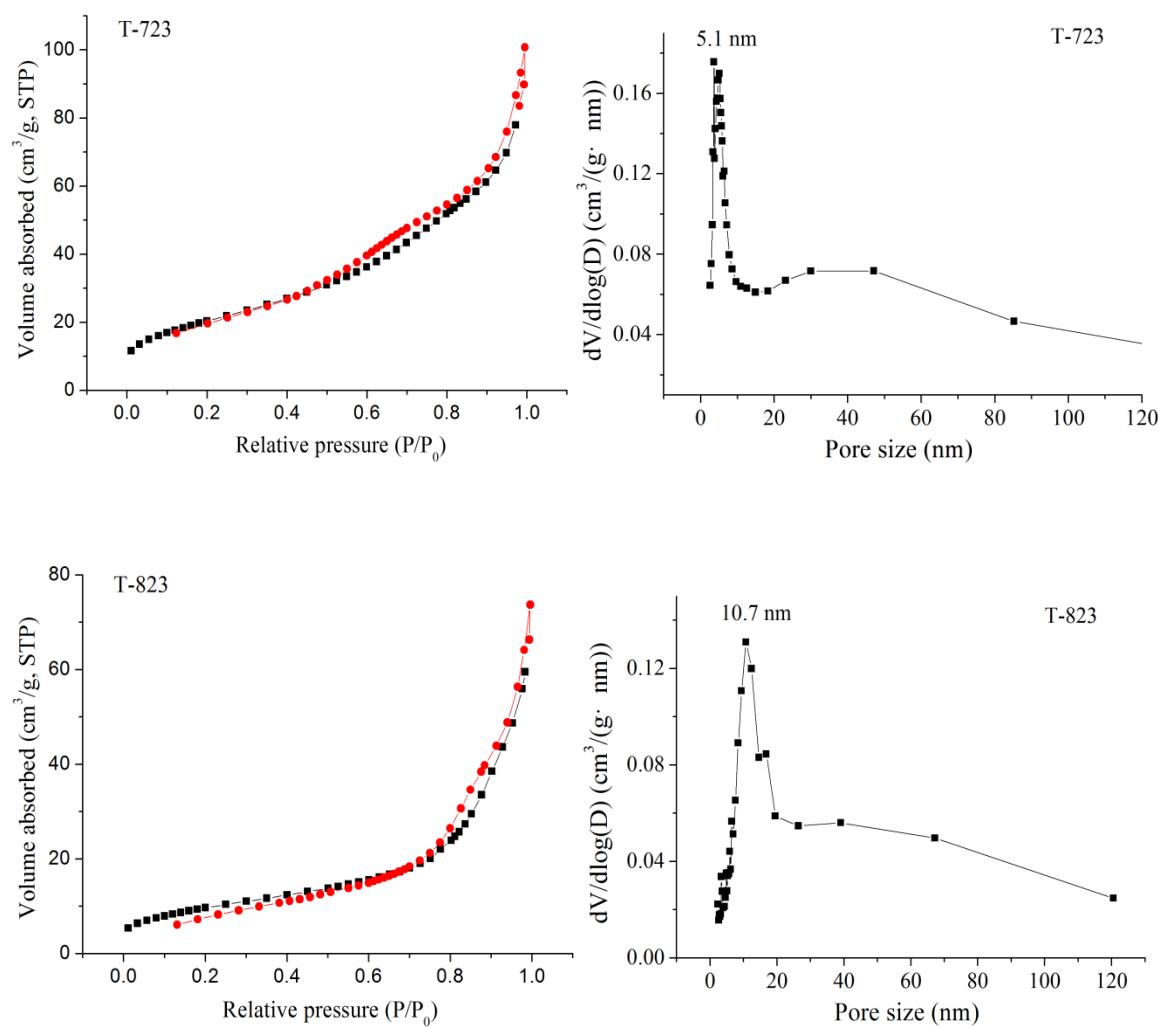

Fig. S3 N<sub>2</sub> adsorption-desorption isotherms (left) and corresponding pore size distribution (PSD) curves (right) of T-723 and T-823.

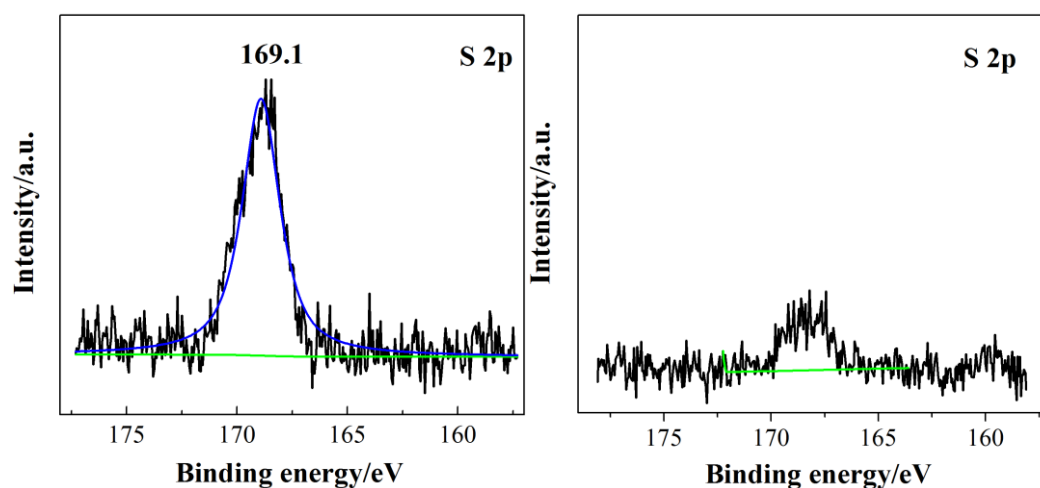

Fig. S4 S2p spectrum of T-773 before (left) and after (right) visible light irradiation in water for 3 h.

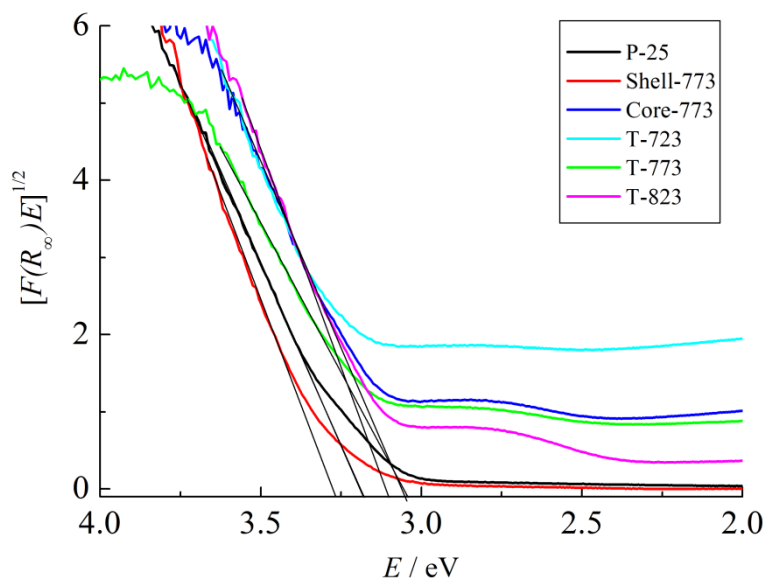

Fig. S5 The modified plot ( $E$  = energy of exciting light) leads to band gaps of P-25,  $\text{TiO}_x$ @anatase samples, Shell-773 and Core-773.  $F(R_\infty) = (1 - R_\infty)^2 / 2R_\infty$ ,  $R_\infty = R_{\text{sample}} / R_{\text{standard}}$ .

To obtain the band gaps ( $E_g$ ) of samples, the modified Kubelka-Munk function is plotted as function of  $E$ . Extrapolation of the linear part of the resulting curve affords the  $E_g$  of P-25(3.27 eV), Shell-773(3.18 eV), Core-773(3.03 eV), T-723(3.04 eV), T-773(3.04 eV) and T-823(3.10 eV).

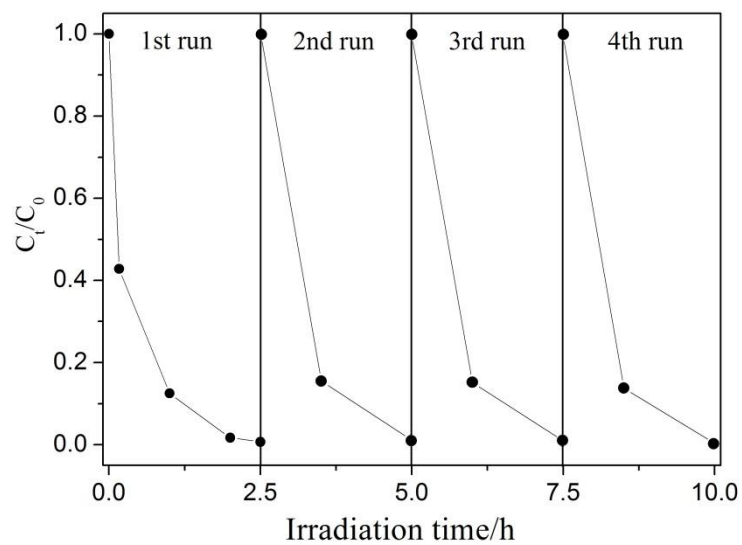

Fig. S6 Cycling runs in the photocatalytic degradation of Rh.B in the presence of T-773 under visible-light irradiation.
